# Supplementary material for: Fatty acid synthesis suppresses dietary polyunsaturated fatty acid use
Source: Research Square preprint supplement (doi:10.21203/rs.3.rs-1008467/v1), 2022-11-21
Supplement: Supplementary file 1 [file 8ace1951a829b8ba694bccfd.docx]

**Supplementary information**

| **Content** | **Page** |
| --- | --- |
| Medical history of index patient | 1 |
| Supplemental table | 2 |
| Supplemental references | 4 |

**Medical history of index patient**

The boy, the first of two children of non-consanguineous healthy parents from Kongo and Angola (Fig. 1A), presented with moderate delay in speech development, autistic behavior and macrocephaly. He was born after an uneventfully pregnancy at term with birth weight of 3790g (+0.80 z) and occipitofrontal head circumference (OFC) of 35 cm (+0.04 z); birth length was not available. Neonatal period and infancy were unremarkable; all milestones of motor development have been reached in time. However, language development was delayed. The index patient started speaking at 2 years of age and spoke only one to two-word sentences at the age of 5 years, whereas his receptive language was substantially better. His behavior was described as reclusive and autistic-like. At the last examination at 5 years and 10 months of age, we saw a friendly tall and mildly obese boy with a length of 127 cm (+1.94 z), a weight of 34,6 kg (+2.77 z), a BMI of 21.5 (+1.94 z) and a OFC of 56 cm (+2.52 z). Blood analysis revealed normal thyroid and liver parameters, but slightly increased creatine kinase (207 U/l, n < 148 U/l). Extensive metabolic work up gave normal results. Ultrasound of abdominal organs was normal except for a hyperechogenic signal of liver tissue suggesting mild hepatic steatosis. Brain MRI was inconspicuous. X-ray of the knee revealed genu varum and a hyperostosis of the medial tibia corticalis. Chromosome analysis showed normal male karyotype, CGH-array and fraX-testing were inconspicuous. To elucidate the cause of developmental delay and behavior problems a trio whole-exome analysis was performed without identification of applicable pathogenic variants in known disease genes. However, a *de novo* missense variant in *FASN* (c.6529C>T, p.Arg2177Cys) was discovered (see also Table S1).

**Supplemental Tables**

| Chr. | Genomic position | Gene | mRNA reference number | Nucleotide change | Amino acid alteration | gnomAD browser: MAF [%] | CADD  (>20) | M-CAP  (>0.025) | ClinPred  (>0.5) | OMIM  phenotype and MIM number |
| --- | --- | --- | --- | --- | --- | --- | --- | --- | --- | --- |
| 17 | 80039106 | *FASN* | NM_004104.4 | c.6529C>T | p.(Arg2177Cys) | 0 | 24.7 | 0.041 | 0.993 | ̶ |
| 1 | 22157724, mat. | *HSPG2* | NM_005529.5 | c.11546G>C | p.(Arg3849Pro) | 0.004604 | 24.0 | 0.117 | 0.064 | DDSH, #224410;  SJS1, #255800 |
| 1 | 22192236, pat. | *HSPG2* | NM_005529.5 | c.4288C>T | p.(Leu1430Phe) | 0.003186 | 23.5 | 0.030 | 0.845 | DDSH, #224410;  SJS1, #255800 |
| 1 | 86818601, pat. | *ODF2L* | NM_001007022.2 | c.1834G>C | p.(Glu612Gln) | 0.004730 | 27.5 | 0.014 | 0.508 | ̶ |
| 1 | 86838152, mat. | *ODF2L* | NM_001007022.2 | c.882A>T | p.(Glu294Asp) | 0.01651 | 24.6 | 0.024 | 0.256 | ̶ |

**Table S1. *In silico* pathogenicity prediction, minor allele frequency, and associated OMIM phenotypes of *de novo* and biallelic variants in the patient**

Trio-exome data were filtered for potentially pathogenic *de novo* variants absent in the general population (dbSNP138, 100 Genomes Project, Exome Variant Server, ExAC Browser, and gnomAD Browser) and rare biallelic and hemizygous variants with minor allele frequency (MAF) <0.1% and no homozygous or hemizygous carriers were found in the aforementioned databases. The functional impact of the identified variants was predicted by the Combined Annotation Dependent Depletion (CADD) tool, the Rare Exome Variant Ensemble Learner (REVEL) scoring system,the Mendelian Clinically Applicable Pathogenicity (M-CAP) Score, and the ClinPred tool. CADD is a framework that integrates multiple annotations in one metric by contrasting variants that survived natural selection with simulated mutations. Reported CADD scores are phred-like rank scores based on the rank of that variant’s score among all possible single nucleotide variants of hg19, with 10 corresponding to the top 10%, 20 at the top 1%, and 30 at the top 0.1%. The larger the score the more likely the variant has deleterious effects; the score range observed here is strongly supportive of pathogenicity, with all observed variants ranking above ~99% of all variants in a typical genome and scoring similarly to variants reported in ClinVar as pathogenic (~85% of which score >15).[1] M-CAP is a classifier for rare missense variants in the human genome, which combines previous pathogenicity scores (including SIFT, Polyphen-2, and CADD), amino acid conservation features and computed scores trained on mutations linked to Mendelian diseases. The recommended pathogenicity threshold is >0.025.2 ClinPred is an ensemble classifier for predicting disease relevance of missense variants, combining random forest and gradient boosting models and employing allele frequencies of the variants in different populations from the gnoamAD database, with a score ranging from 0-1. The higher the score the more likely the variant is pathogenic. The recommended pathogenicity threshold is ≥ 0.5.3 DDSH = Dyssegmental dysplasia, Silverman-Handmaker type; SJS1 = Schwartz-Jampel syndrome type 1; Chr. = chromosome; MAF = minor allele frequency; mat. = maternal; pat. = paternal; ̶ = not available.

**Supplemental References**

1. Kircher, M., et al., *A general framework for estimating the relative pathogenicity of human genetic variants.* Nat Genet, 2014. **46**(3): p. 310-5.
